# Supplementary material for: Detecting antimicrobial resistance in Escherichia coli using benchtop attenuated total reflectance-Fourier transform infrared spectroscopy and machine learning
Source: Royal Society of Chemistry journal article supplement (doi:10.1039/d1an00546d), 2021-01-01
Supplement: d1an00546d1.pdf [file d1an00546d1.pdf]

**Electronic Supplementary Information for:**

**Detecting antimicrobial resistance in *Escherichia coli* using benchtop attenuated total reflectance-Fourier transform infrared spectroscopy and machine learning**

Hewa G. S. Wijesinghe,<sup>ab</sup> Dominic J. Hare,<sup>cd</sup> Ahmed Mohamed,<sup>ef</sup> Alok K. Shah,<sup>eg</sup> Patrick N. A. Harris<sup>ahi</sup> and Michelle M. Hill<sup>\*ae</sup>

<sup>a</sup> *Centre for Clinical Research, Faculty of Medicine, The University of Queensland, Herston, QLD, 4006, Australia*

<sup>b</sup> *School of Chemistry and Molecular Biosciences, The University of Queensland, St. Lucia, QLD, 4067, Australia.*

<sup>c</sup> *Atomic Medicine Initiative, University of Technology Sydney, Broadway, NSW, 2007, Australia.*

<sup>d</sup> *Monash eResearch Centre, Monash University, Clayton, 3800, Australia (present address).*

<sup>e</sup> *QIMR Berghofer Medical Research Institute, Herston, Brisbane, QLD, 4006, Australia. Email. Michelle.Hill@qimrberghofer.edu.au*

<sup>f</sup> *WEHI, Parkville, VIC, 3052, Australia (present address).*

<sup>g</sup> *CSL Limited, Parkville, VIC, 3052, Australia (present address).*

<sup>h</sup> *Herston Infectious Disease Institute, Royal Brisbane & Women's Hospital, Herston, QLD, 4029, Australia.*

<sup>i</sup> *Central Microbiology, Pathology Queensland, Royal Brisbane & Women's Hospital, Herston, QLD, 4029, Australia.*

## **CONTENTS:**

**ESI Fig 1. Summary spectra for clinical *E. coli* isolates.**

**ESI Fig 2. Variable importance plot of mean spectral differences using *RFFGlobal* and *PLS* models showing major contributing peak regions.**

Data availability statement: All raw data can be accessed via FigShare at:

<https://figshare.com/s/e2c90fc53cec708bb4b9>

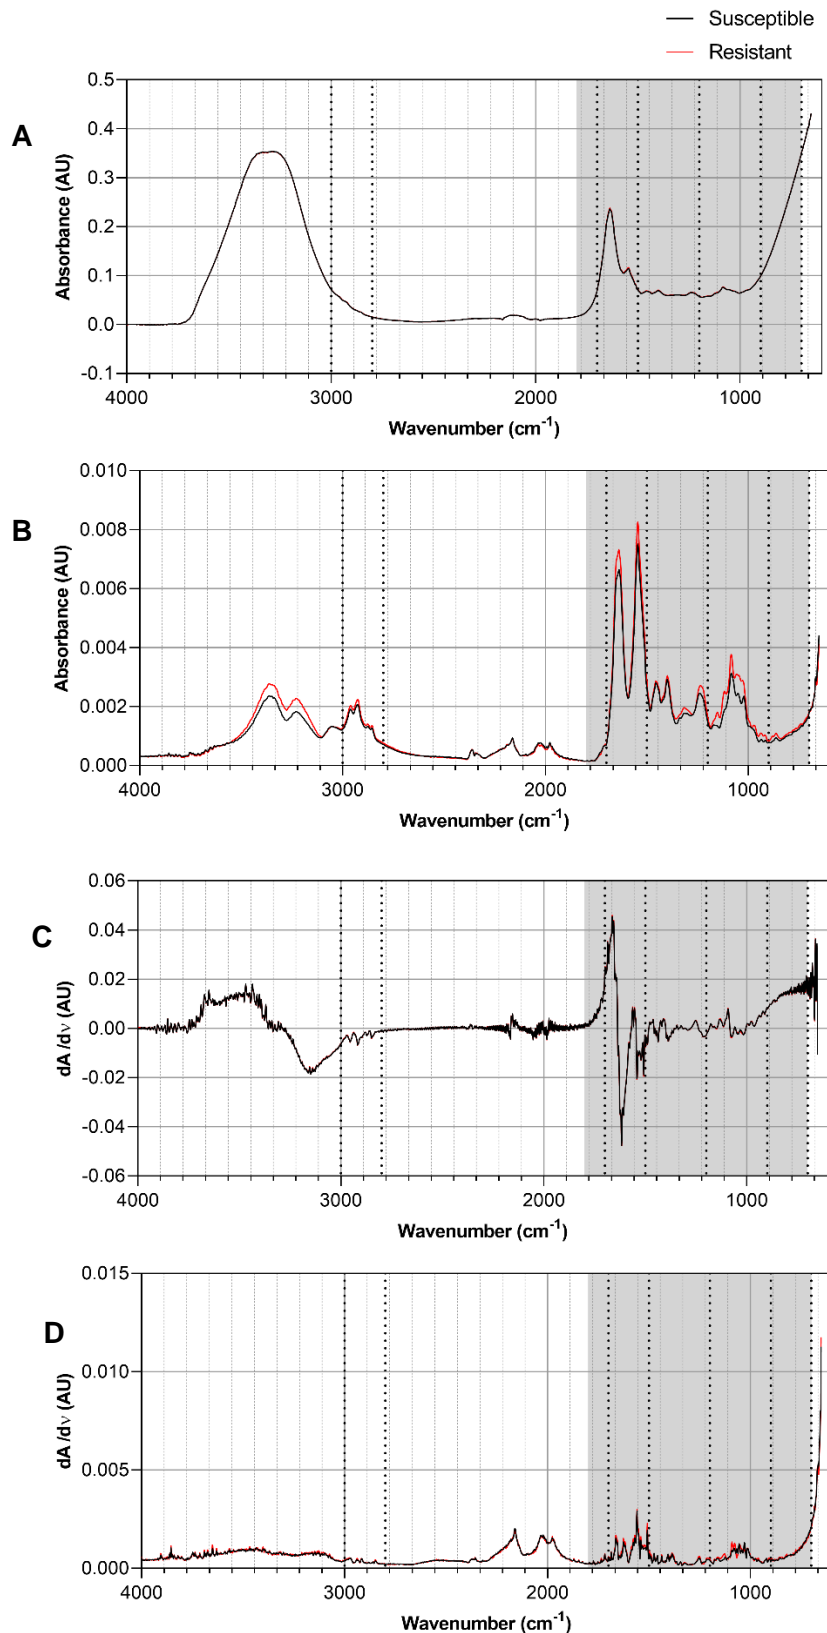

**ESI Fig 1. Summary spectra for clinical *E. coli* isolates.** Average FTIR absorbance (A) and standard deviation (B) plots of raw spectra and the average (C) and standard deviation (D) of Spectra following pre-processing using Savitzky-Golay smoothing (order of 3, window size of 5) and first derivative transformation for 63 ceftriaxone resistant *E. coli* strains (red) and 37 susceptible strains (blue).

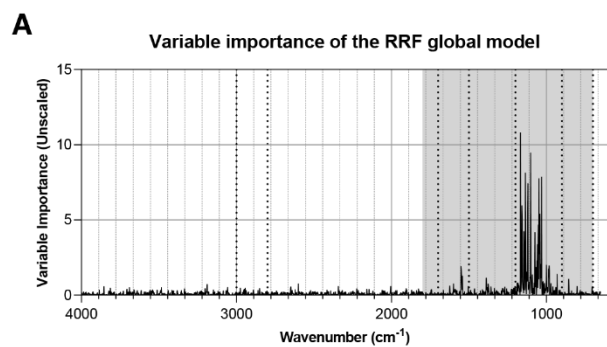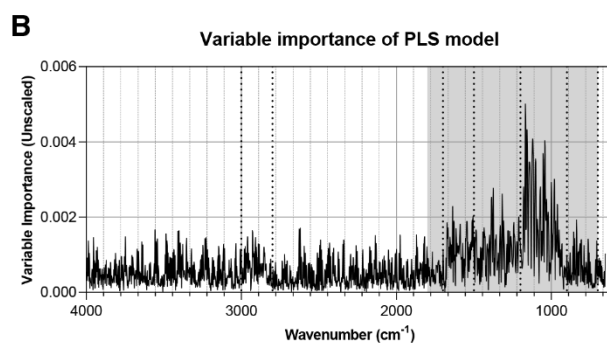

ESI Fig 2. Variable importance plot of mean spectral differences using *RRFGlobal* and *PLS* models showing major contributing peak regions.

*Table 1. Different machine learning methods used in the study, abbreviated names (used by caret library) and the respective libraries used to implement them in R*

| <b>Abbreviation</b> | <b>Method Name</b>                                                     | <b>R Library</b>     |
|---------------------|------------------------------------------------------------------------|----------------------|
| LogitBoost          | Boosted Logistic Regression                                            | caTools              |
| RRF                 | Regularized Random Forest                                              | randomForest, RRF    |
| RRFglobal           | Regularized Random Forest                                              | RRF                  |
| dwdLinear           | Linear Distance Weighted Discrimination                                | kerndwd              |
| dwdPoly             | Distance Weighted Discrimination with Polynomial Kernel                | kerndwd              |
| dwdRadial           | Distance Weighted Discrimination with Radial Basis Function Kernel     | Kernlab, kern-dwd    |
| gaussprRadial       | Gaussian Process with Radial Basis Function Kernel                     | kernlab              |
| gbm                 | Gradient Boosting Machines                                             | h2o                  |
| gcvEarth            | Multivariate Adaptive Regression Splines                               | earth                |
| hdda                | High Dimensional Discriminant Analysis                                 | HDclassif            |
| kernelpls           | Partial Least Squares                                                  | pls                  |
| knn                 | k-Nearest Neighbors                                                    | kknn                 |
| mlp                 | Multi-Layer Perceptron                                                 | RSNNS                |
| mlp-WeightDecay     | Multi-Layer Perceptron                                                 | RSNNS                |
| monmlp              | Monotone Multi-Layer Perceptron Neural Network                         | monmlp               |
| naive_bayes         | Naive Bayes                                                            | naivebayes           |
| null                | Non-Informative Model                                                  | NULL                 |
| pam                 | Nearest Shrunken Centroids                                             | pamr                 |
| pls                 | Generalized Partial Least Squares                                      | gpls                 |
| ranger              | Random Forest                                                          | e1071, ranger, dplyr |
| rbfDDA              | Radial Basis Function Network                                          | RSNNS                |
| rf                  | Quantile Random Forest                                                 | quantregForest       |
| sdwd                | Sparse Distance Weighted Discrimination                                | sdwd                 |
| simpls              | Partial Least Squares                                                  | pls                  |
| svmLinear           | Least Squares Support Vector Machine                                   | kernlab              |
| svmLinear2          | Support Vector Machines with Linear Kernel                             | e1071                |
| svmLinear-Weights   | Linear Support Vector Machines with Class Weights                      | e1071                |
| svmPoly             | Least Squares Support Vector Machine with Polynomial Kernel            | kernlab              |
| svmRadial           | Least Squares Support Vector Machine with Radial Basis Function Kernel | kernlab              |
| svmRadialCost       | Support Vector Machines with Radial Basis Function Kernel              | kernlab              |
| svmRadialSigma      | Support Vector Machines with Radial Basis Function Kernel              | kernlab              |
| svmRadial-Weights   | Support Vector Machines with Class Weights                             | kernlab              |
| widekernelpls       | Partial Least Squares                                                  | pls                  |
| xgbDART             | eXtreme Gradient Boosting                                              | xgboost, plyr        |
| xgbLinear           | eXtreme Gradient Boosting                                              | xgboost              |
| xgbTree             | eXtreme Gradient Boosting                                              | Xgboost, plyr        |
